# Supplementary material for: Study of the Relationship between Body Mass Index, Body Image, and Lifestyle Behaviors: A Community Survey in Fiji
Source: PubMed Central journal article supplement (PMC7733744; doi:10.31662/jmaj.2019-0042), 2019-11-08
Supplement: 2433-3298-3-1-0041-s001.pdf [file 2433-3298-3-1-0041-s001.pdf]

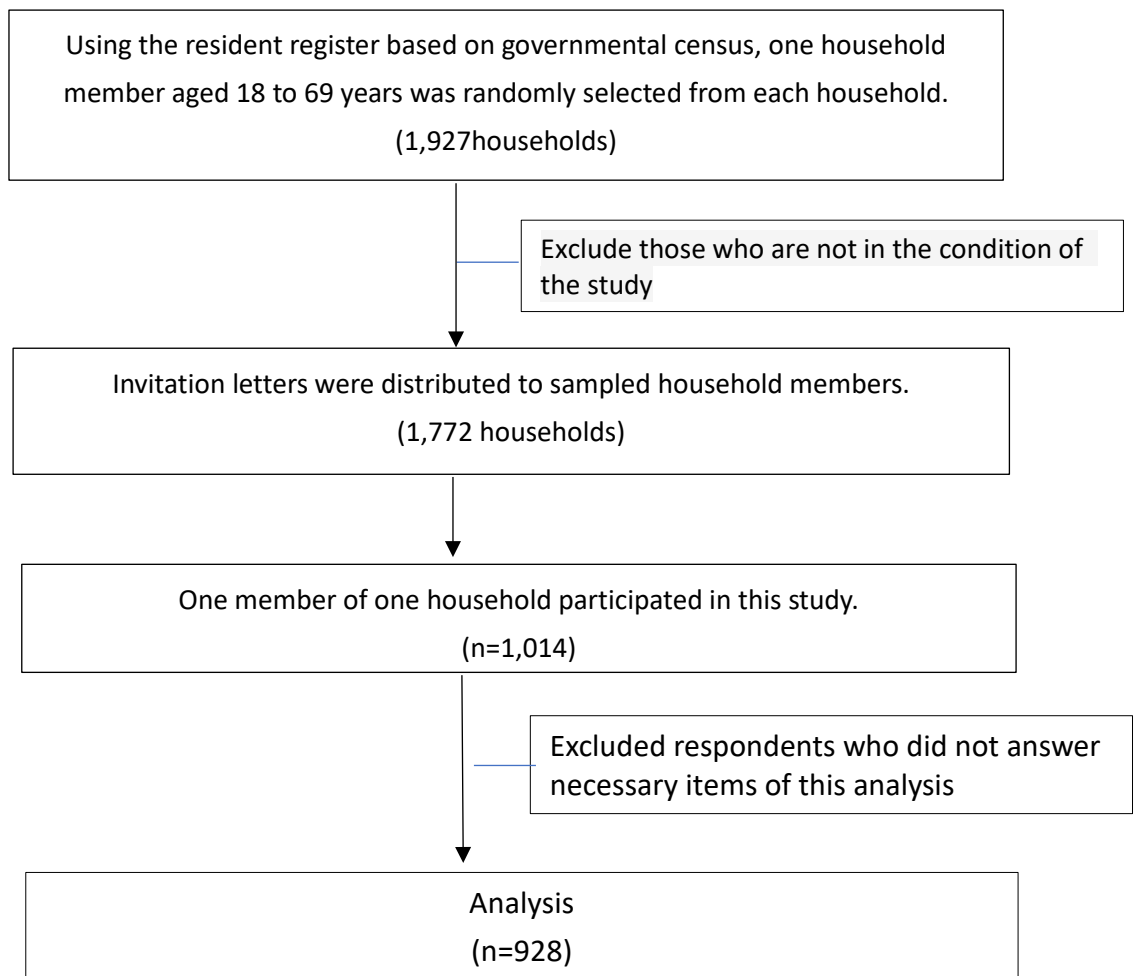

## **Study population**
